# Supplementary material for: LincRNA01703 Facilitates CD81+ Exosome Secretion to Inhibit Lung Adenocarcinoma Metastasis via the Rab27a/SYTL1/CD81 Complex
Source: MDPI journal article supplement (doi:10.3390/cancers15245781), 2023-12-09

Figure S1

G

Repeat 1

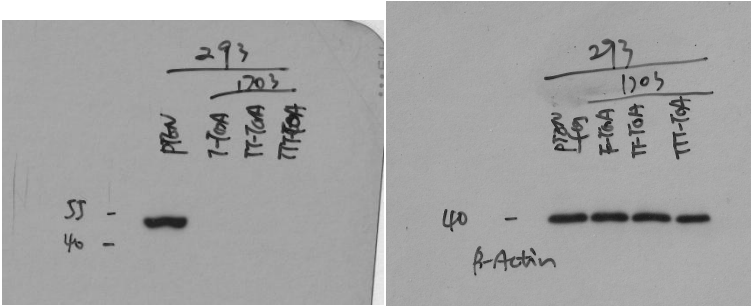

Repeat 2

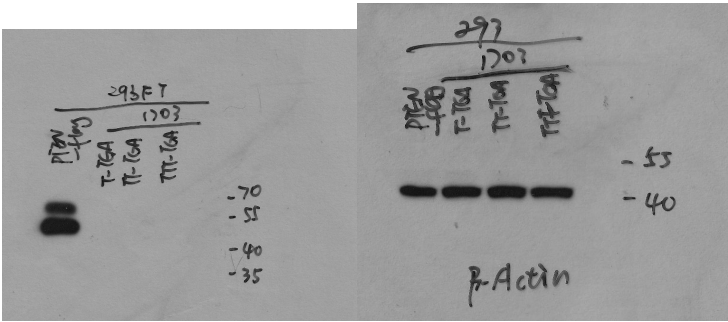

Repeat3

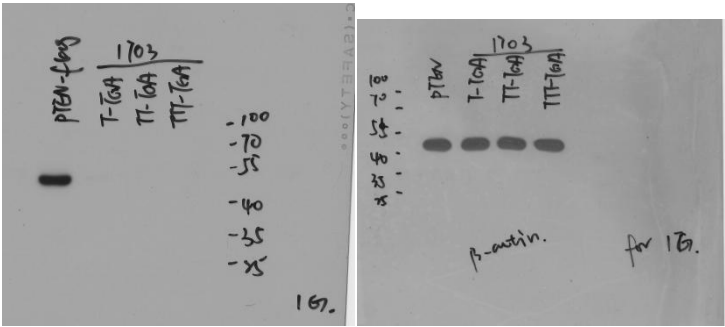

Figure S3

E

Repeat 1

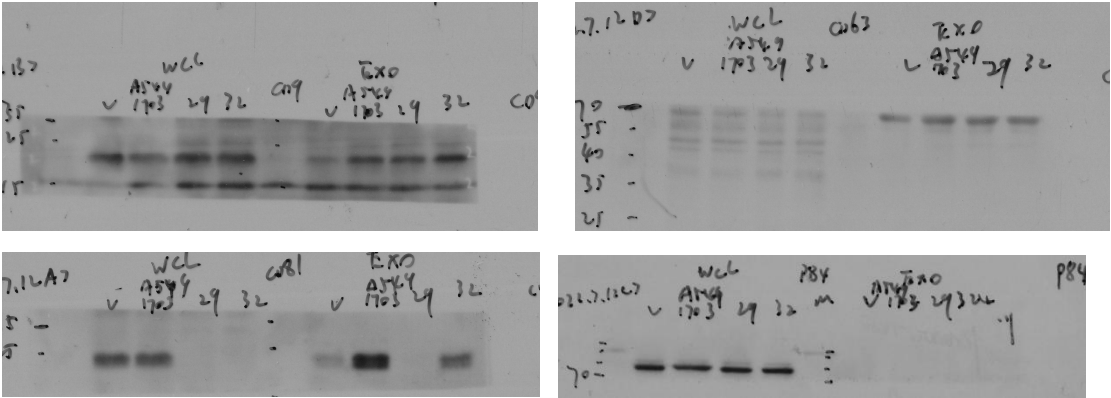

Repeat 2

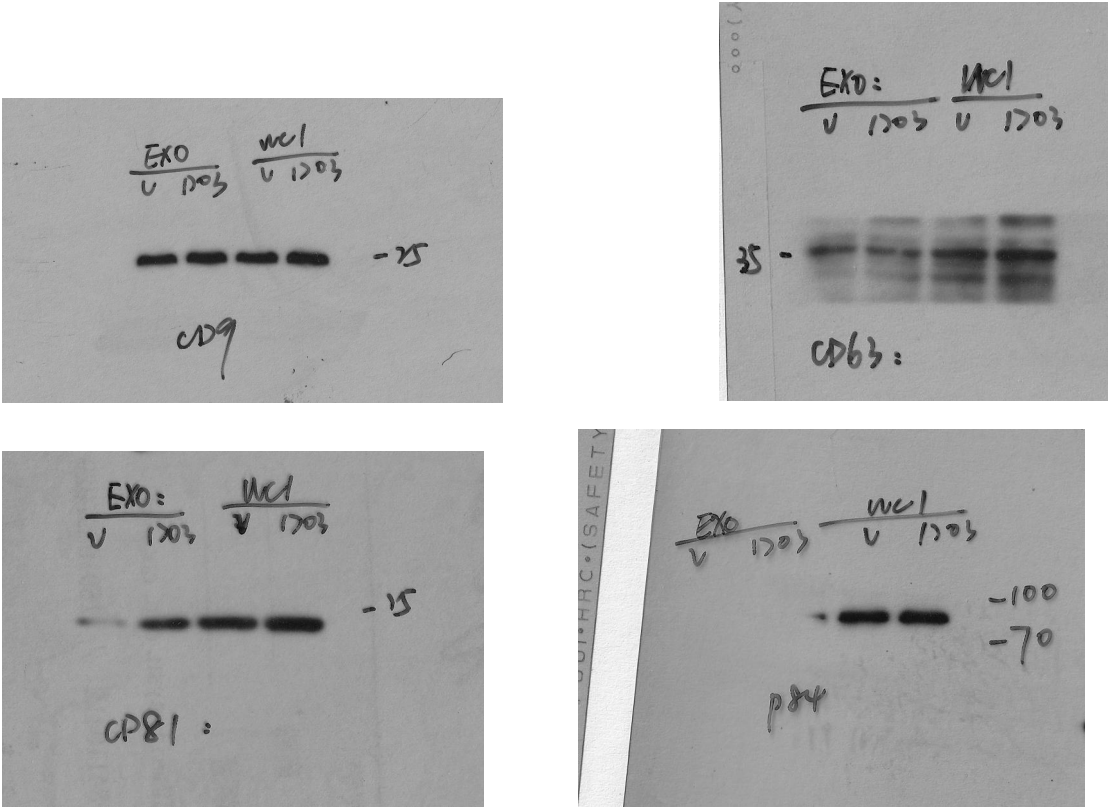

Repeat 3

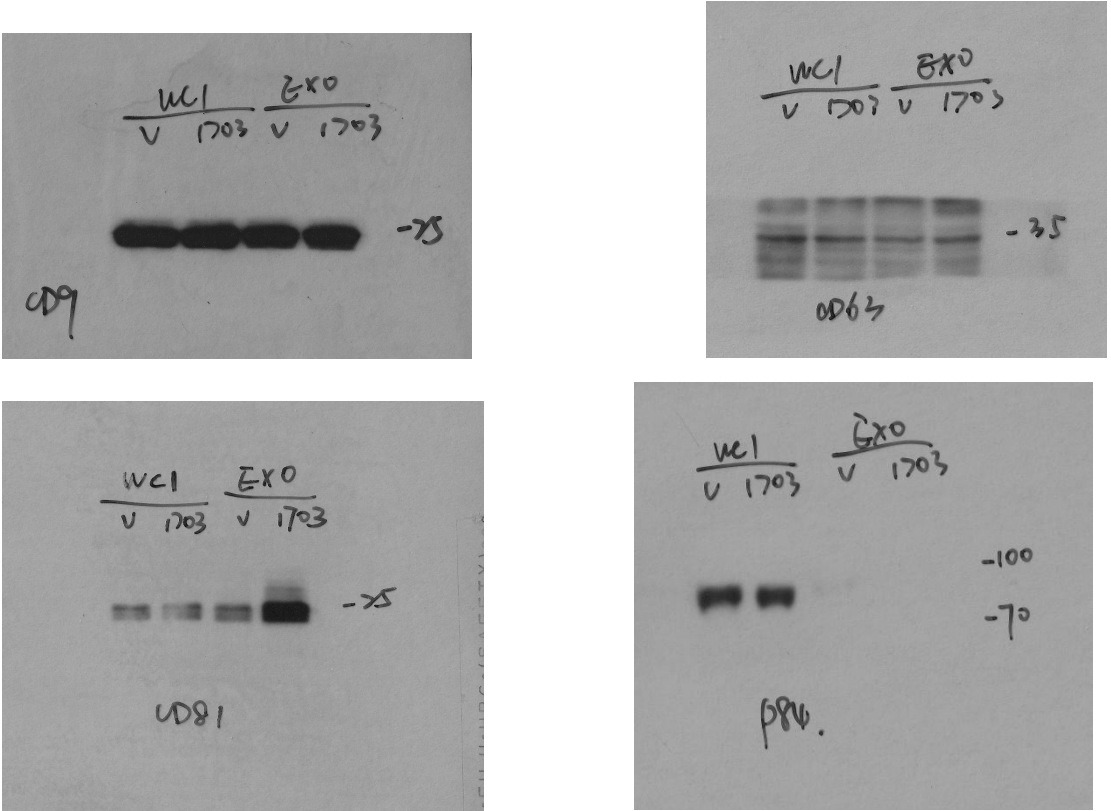

Figure S4

A

Repeat 1

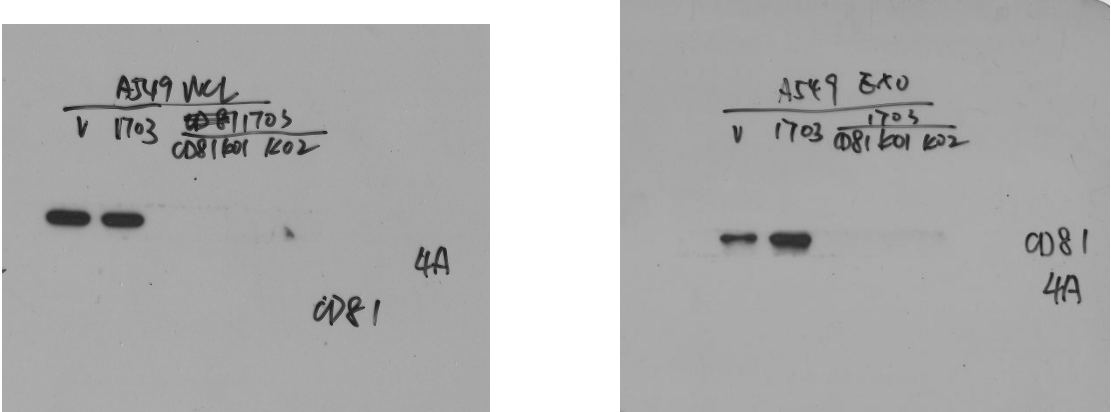

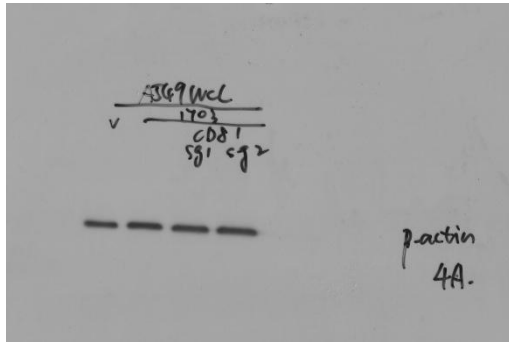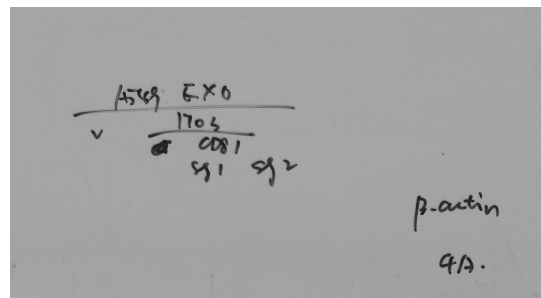

Repeat 2

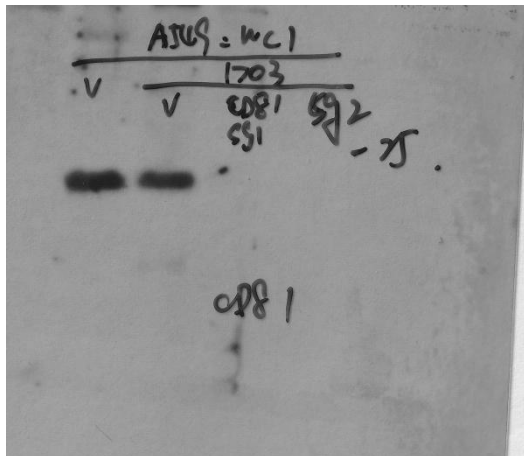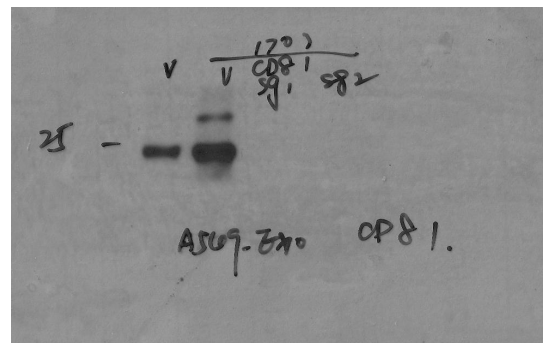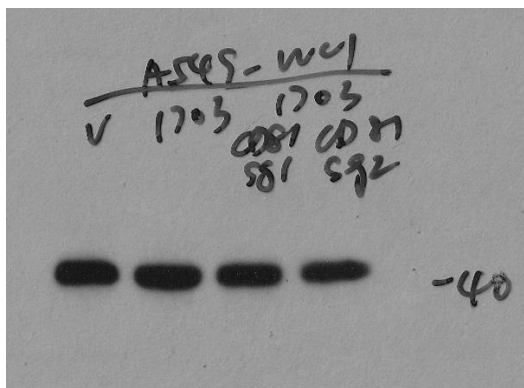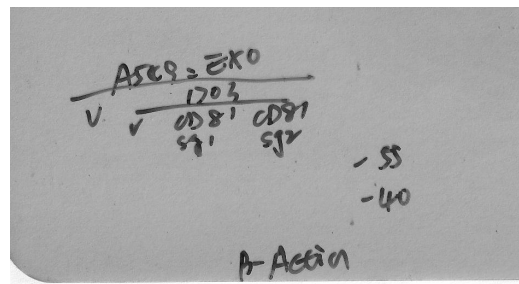

Repeat 3

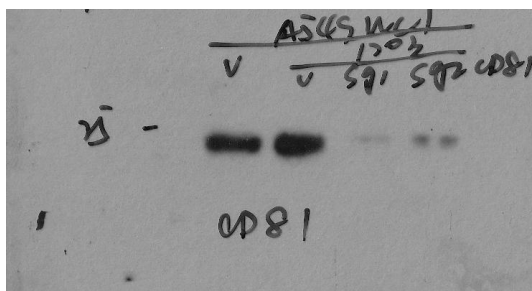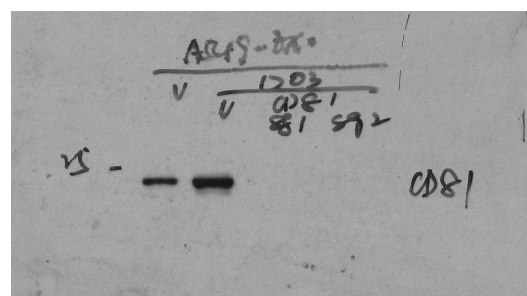

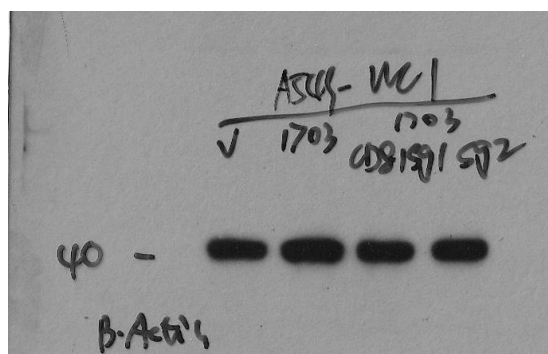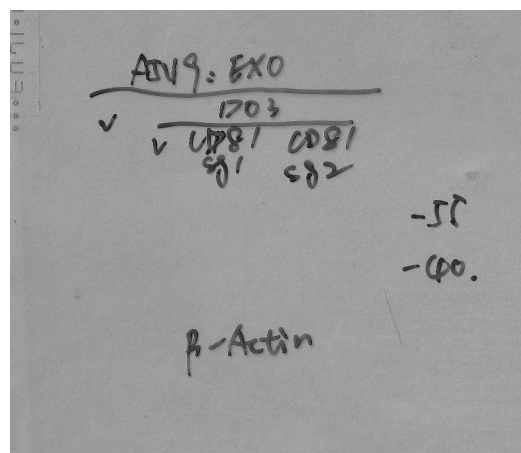

Figure S5

C

Repeat 1

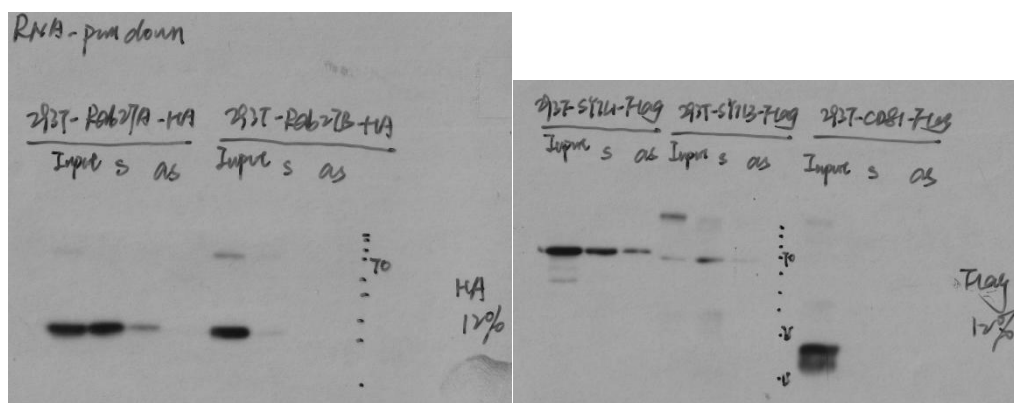

Repeat 2

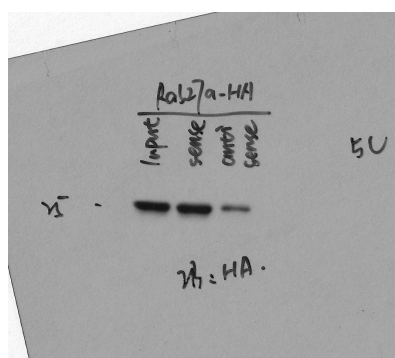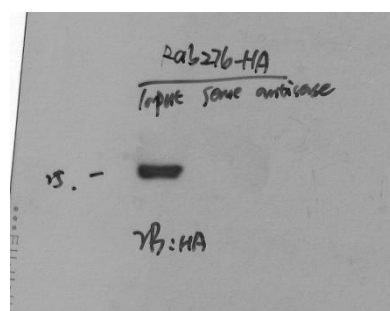

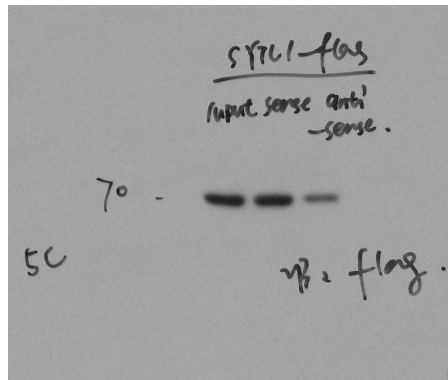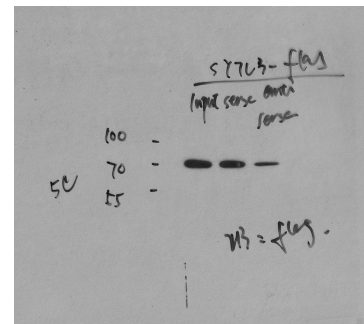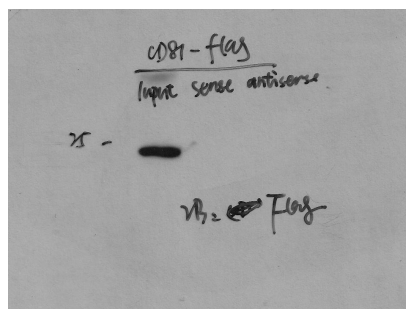

Repeat 3

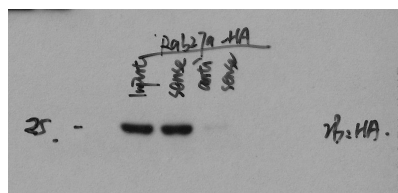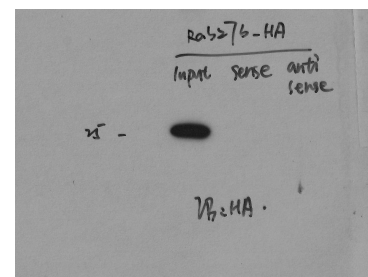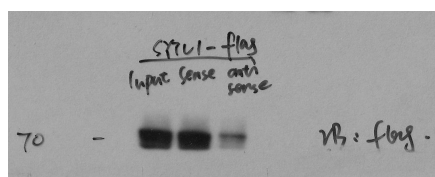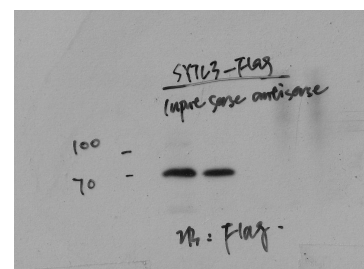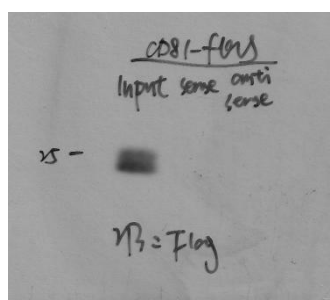

Figure S5

D

Repeat 1

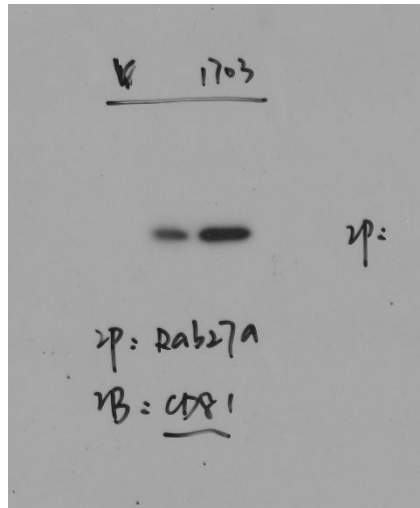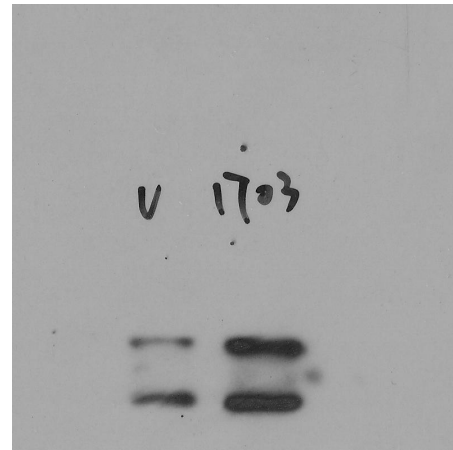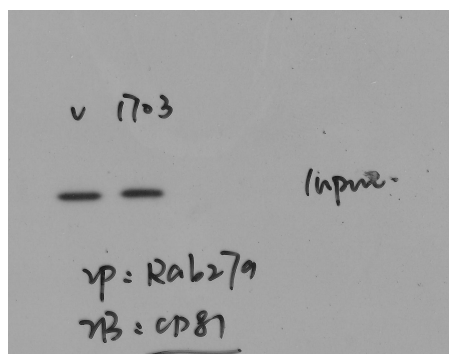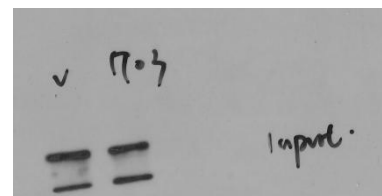

Repeat 2

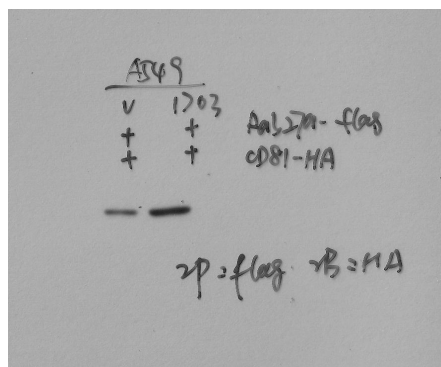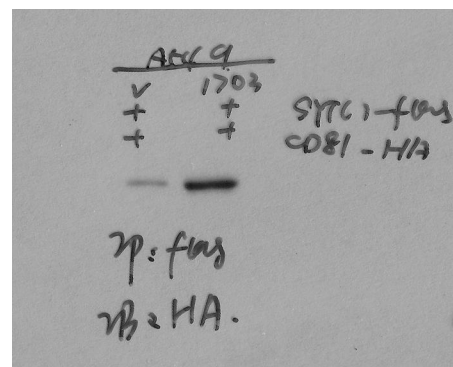

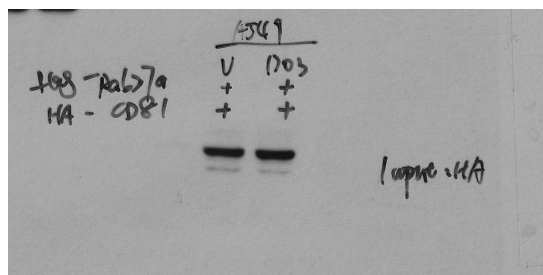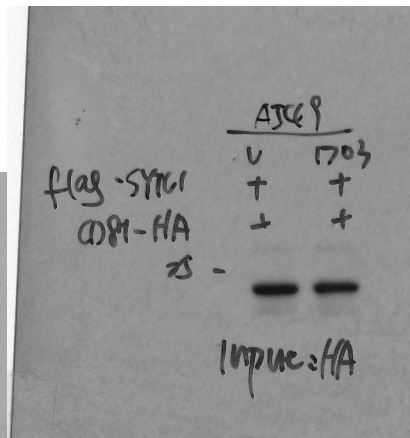

Repeat 3

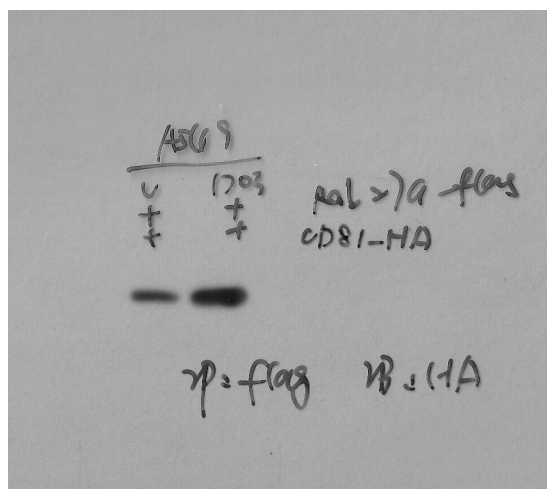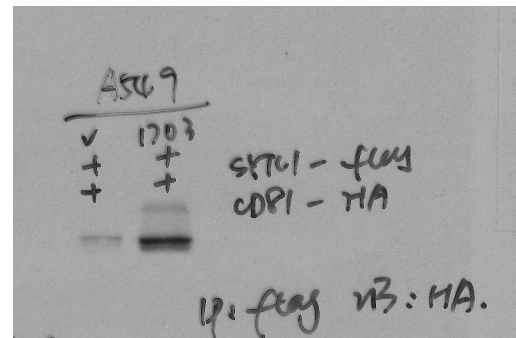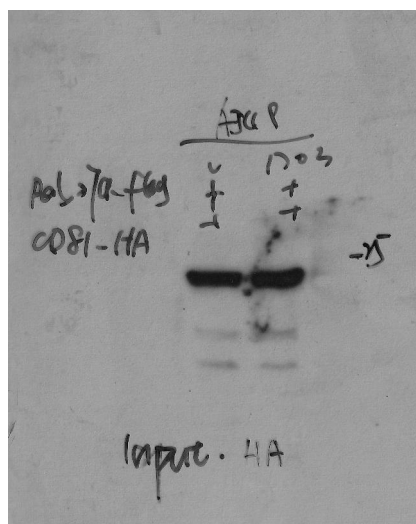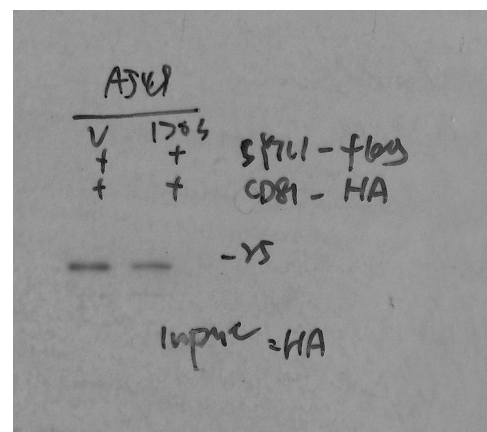

Figure S5

E



Repeat 1

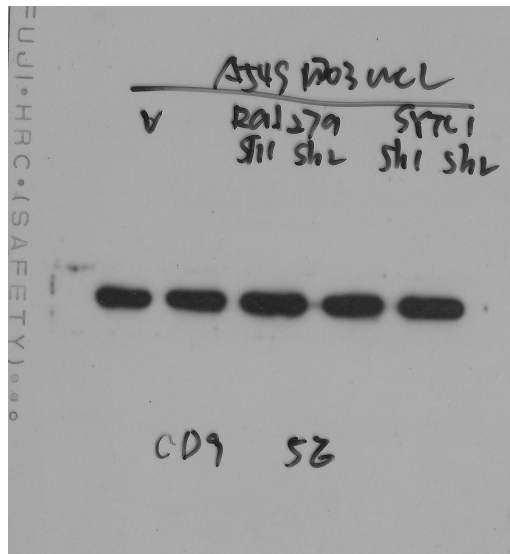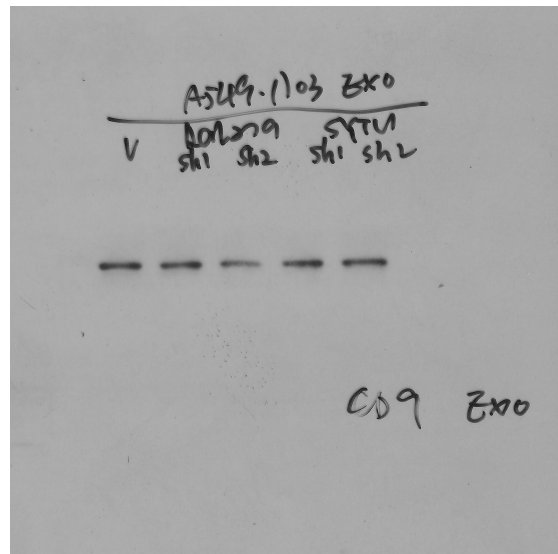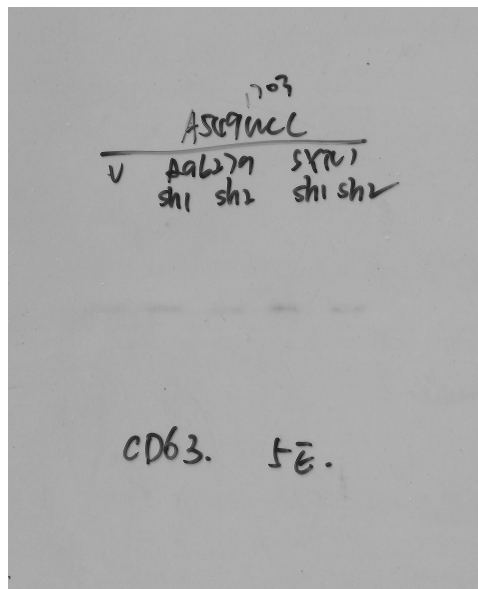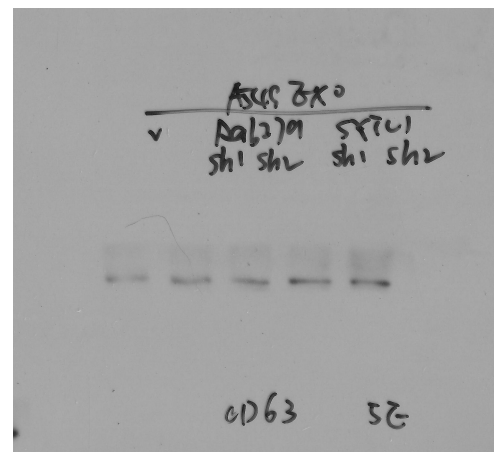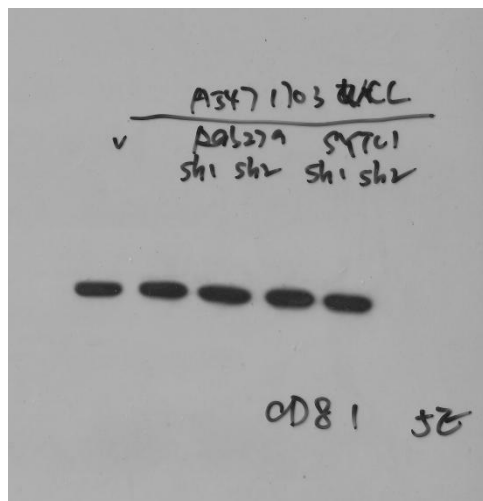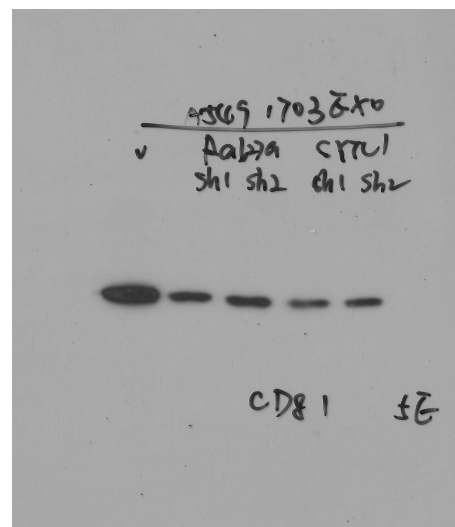

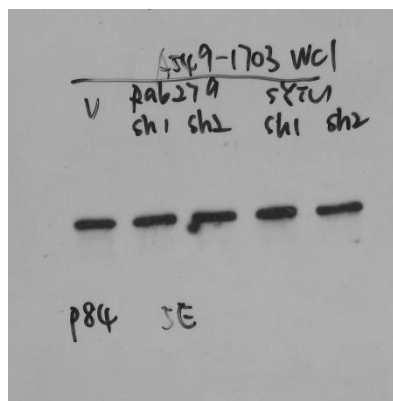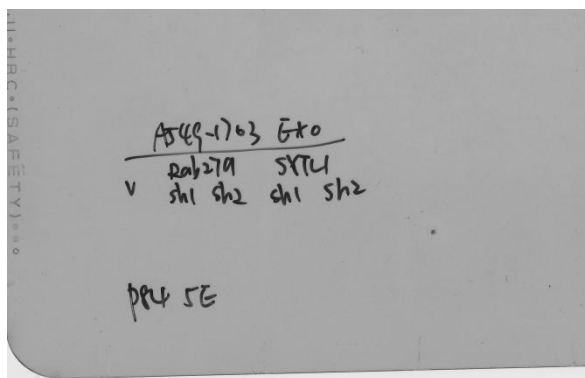

Repeat 2

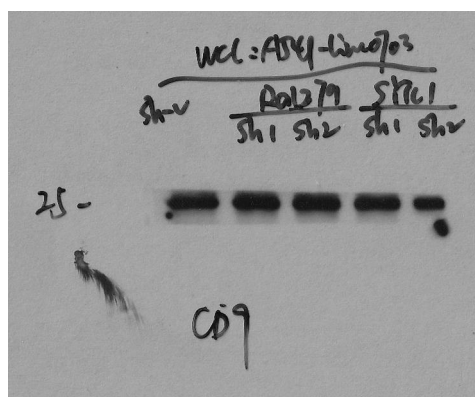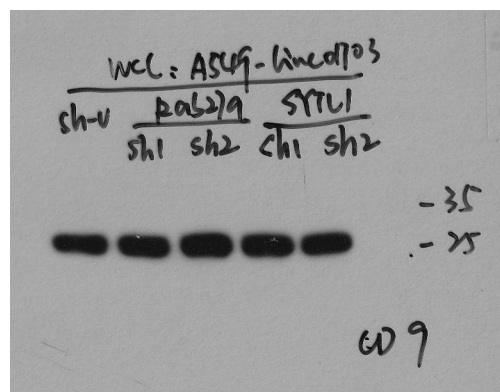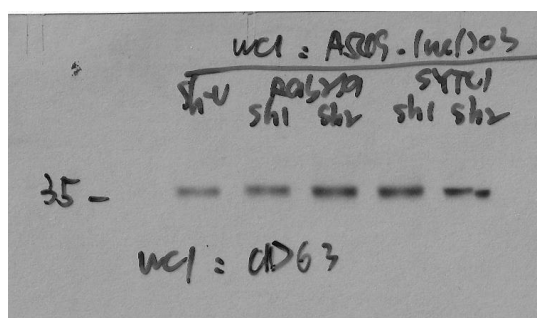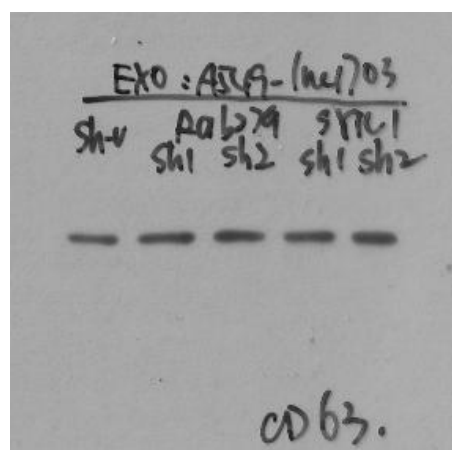

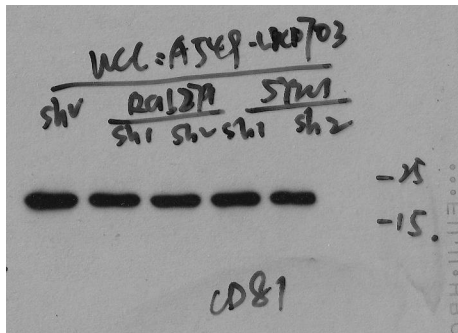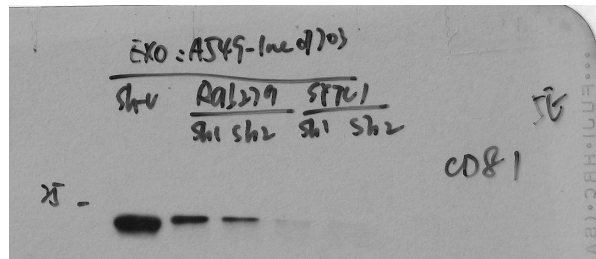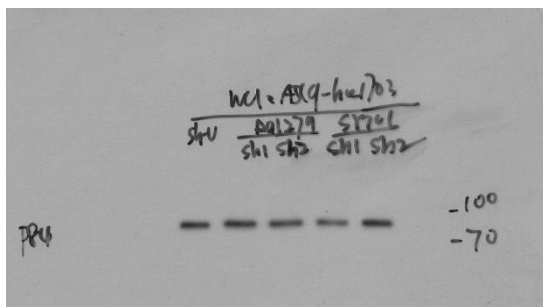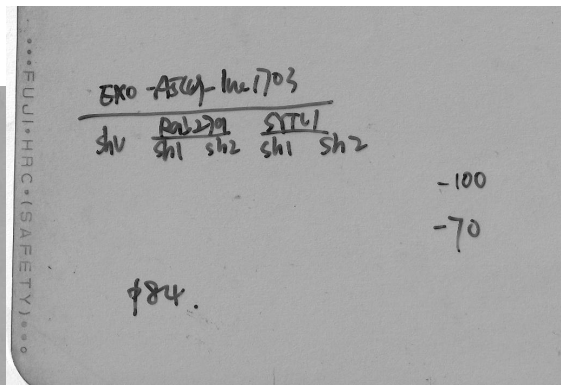

Repeat 3

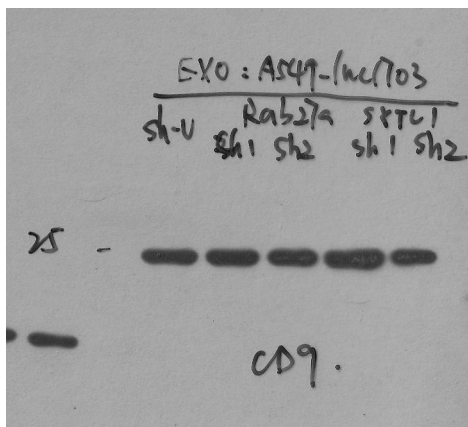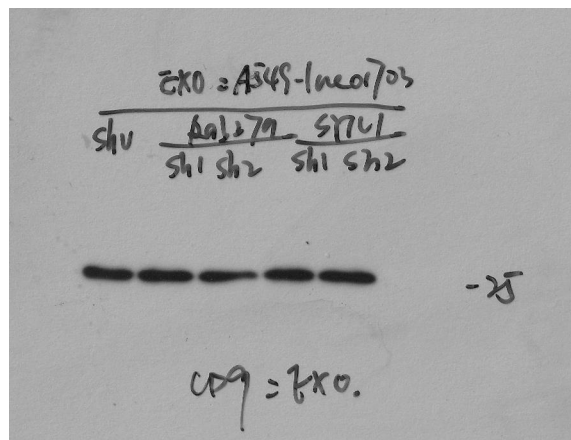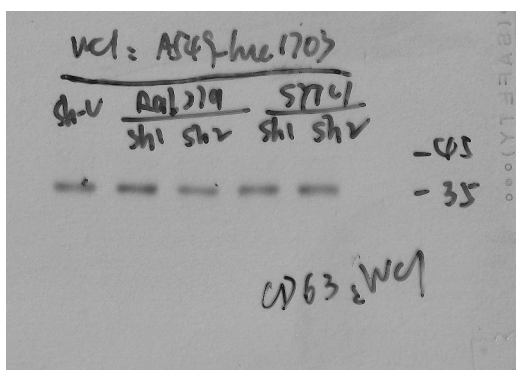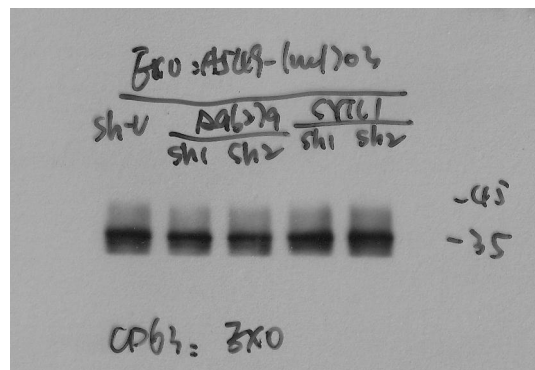

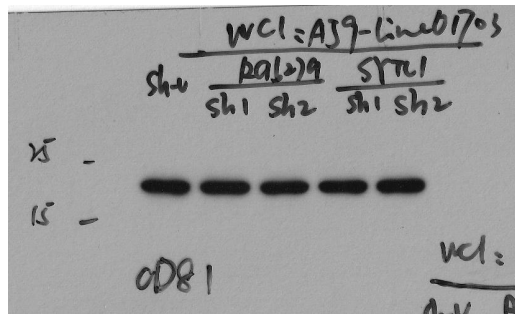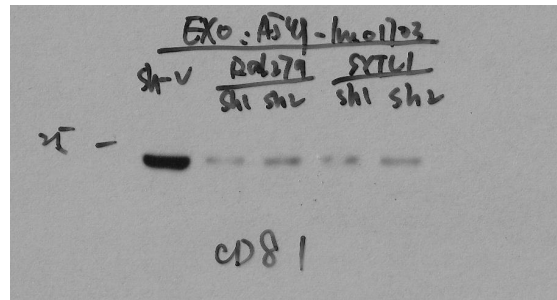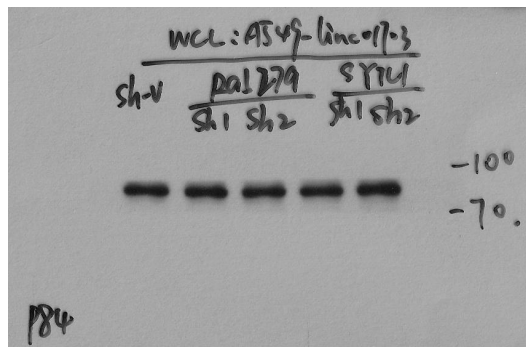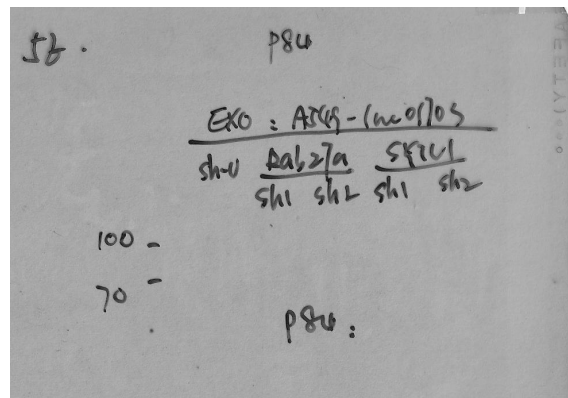

Figure S5

G

Repeat 1

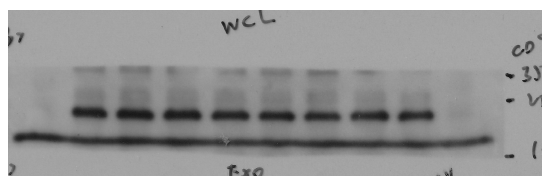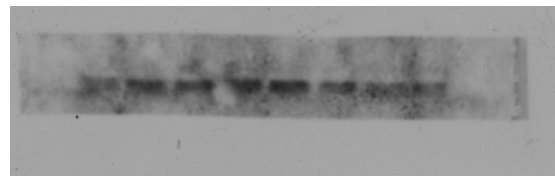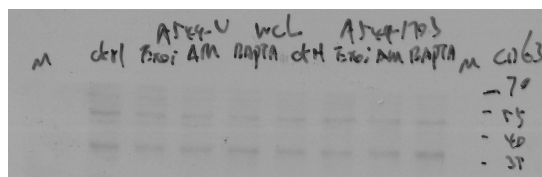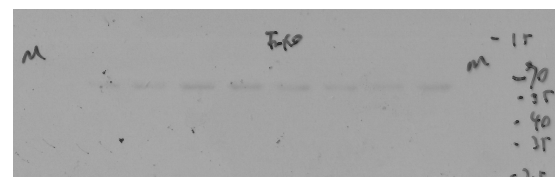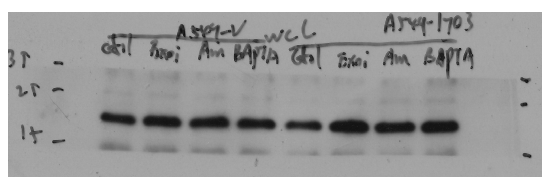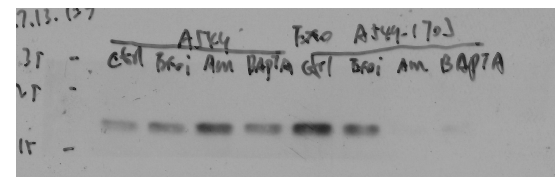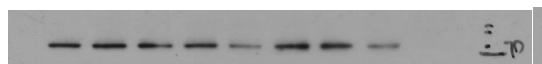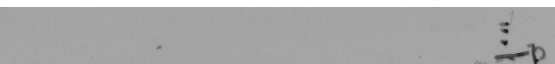

## Repeat 2

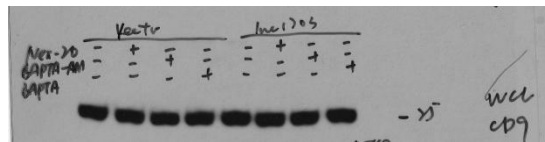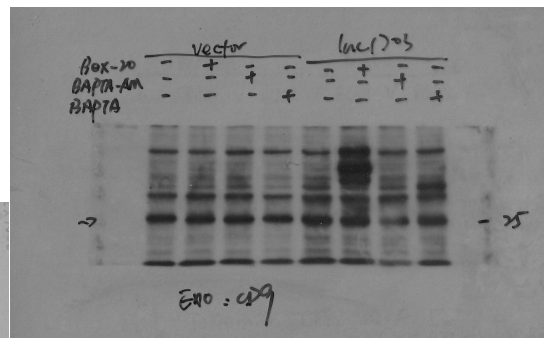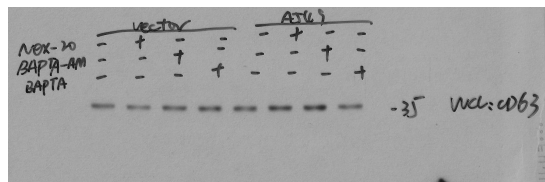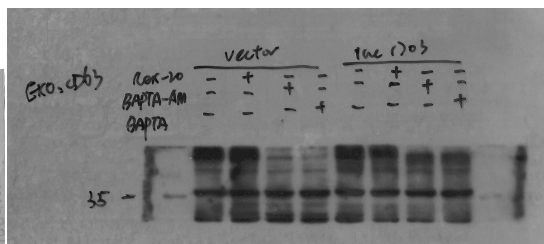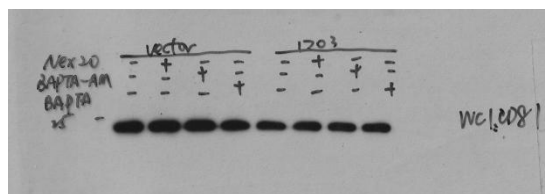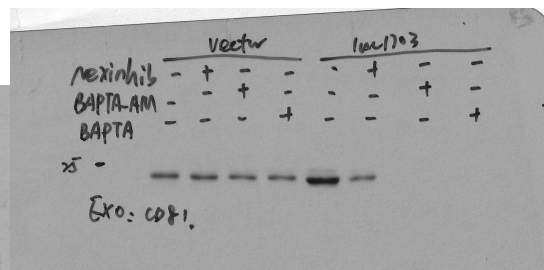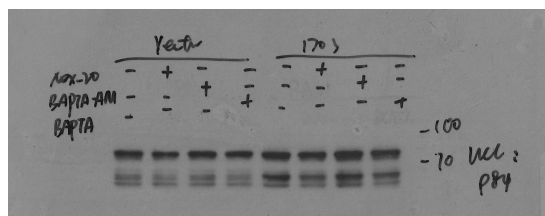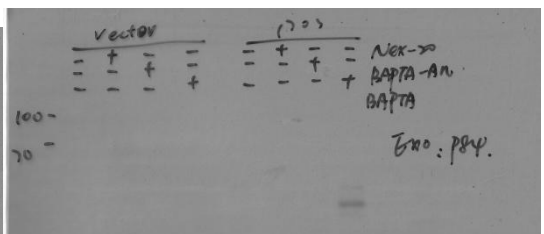

## Repeat 3

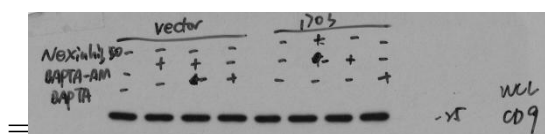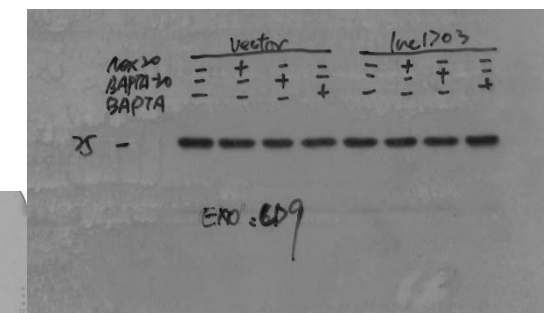

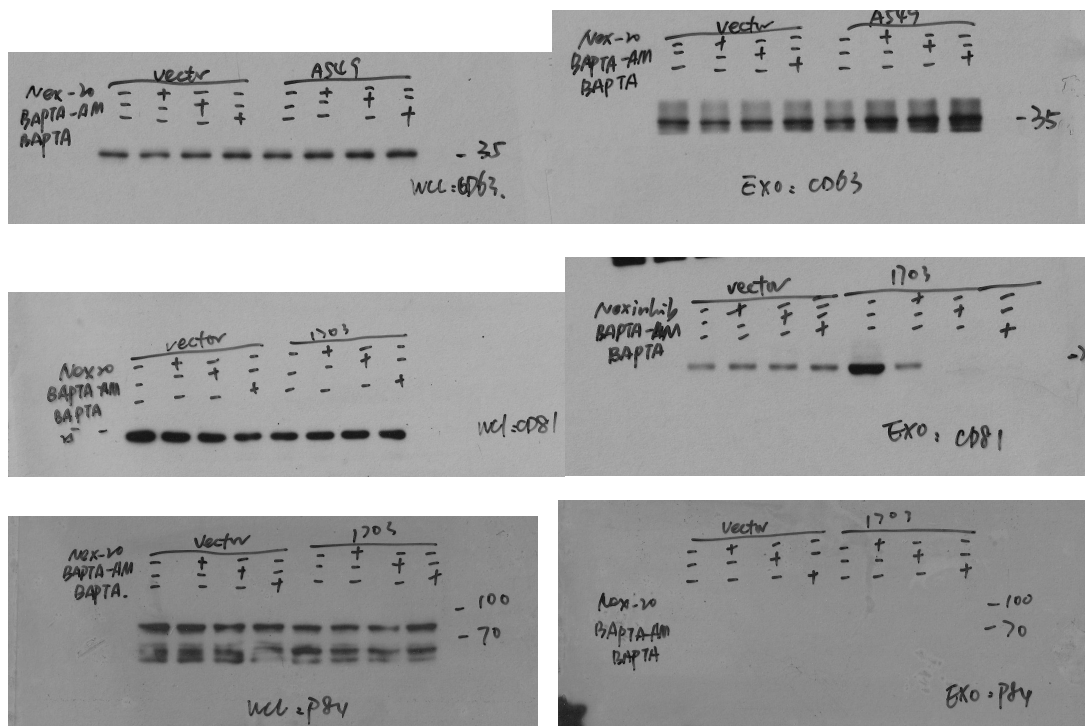

Figure S6

C

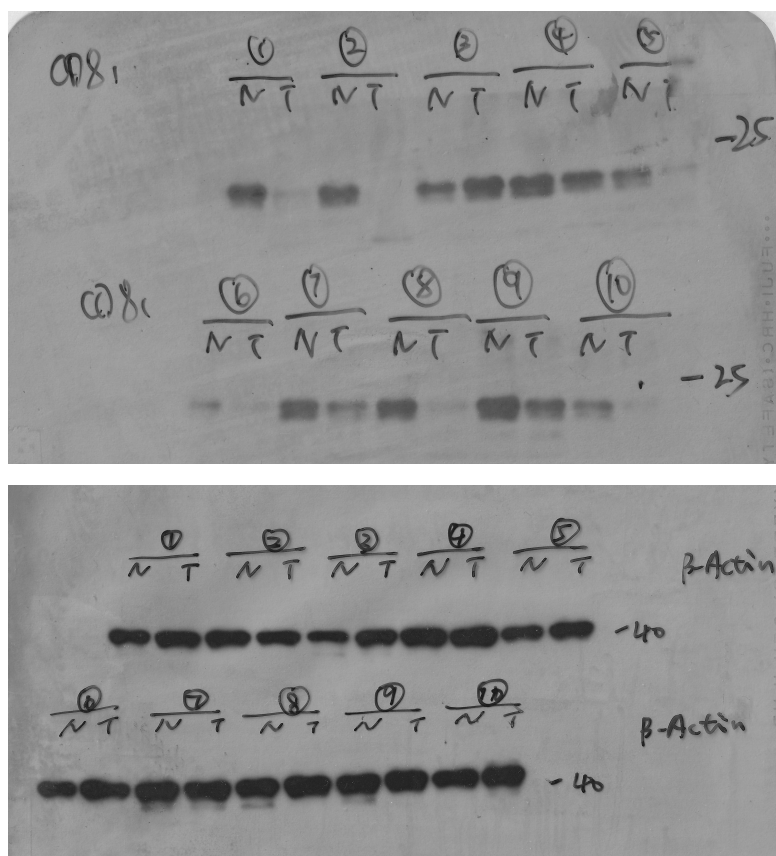

Supplement: s1 [file s1]
