# Supplementary material for: LincRNA01703 Facilitates CD81+ Exosome Secretion to Inhibit Lung Adenocarcinoma Metastasis via the Rab27a/SYTL1/CD81 Complex
Source: MDPI journal article supplement (doi:10.3390/cancers15245781), 2023-12-09
Supplement: s1 [file s1]

**Supplementary Table S1: Oligos used for knockdown or knockout genes**

|            |                           |
|------------|---------------------------|
| CD81 sg1   | CACCGTGATGACGCCAACAACGCCA |
| CD81 sg2   | CACCGGGTGAAGACCTTCCACGAGA |
| Rab27a sh1 | CCAGTGTACTTTACCAATATA     |
| Rab27a sh2 | CGGATCAGTTAAGTGAAGAAA     |
| SYTL1 sh1  | CCCTGTGTTCAATCACACCAT     |
| SYTL1 sh2  | GCGTCCCAGATCCTGGAGAAT     |

**Supplementary Table S2: Sense and antisense primers used for qRT-PCR**

|                      |                         |
|----------------------|-------------------------|
| Linc01703 sense:     | ATACCCTAGGAGATGGAGGAAC  |
| Linc01703 antisense: | GGCAACAGTGGCTTGAGATA    |
| SYTL1 sense:         | CCATCGCAAGAGGGGCTTT     |
| SYTL1 antisense:     | TCCAACAGTCCTTCAGTCTCA   |
| SYTL2 sense:         | GCCCAGTGTAAGGACTTAGCA   |
| SYTL2 antisense:     | GCCTTTGTCTGGTAGCAAATAGG |
| SYTL3 sense:         | GAGACCAGGCGGTTCAAAACA   |
| SYTL3 antisense:     | CCTTTCCACCGGAGATGCTG    |
| SYTL4 sense:         | CAACACTACAGTGATCGGACC   |
| SYTL4 antisense:     | ACAACCCCGACAAGTATTGGT   |
| SYTL5 sense:         | ATGATCCTGGGCGTCCTAAAG   |
| SYTL5 antisense:     | TCCCACTTCTACGTTTTGCTTC  |
| MEIS1 sense:         | GGGCATGGATGGAGTAGGC     |
| MEIS1 antisense:     | GGGTACTGATGCGAGTGCAG    |
| PDCD6 sense:         | ATGGCCGCCTACTCTTACC     |
| PDCD6 antisense:     | TCCTGTCTTTATCGACCCTCTG  |
| Rab27A sense:        | GCTTTGGGAGACTCTGGTGTA   |
| Rab27A antisense:    | TCAATGCCCACTGTTGTGATAAA |
| Rab27B sense:        | TAGACTTTCGGGAAAAACGTGTG |
| Rab27B antisense:    | AGAAGCTCTGTTGACTGGTGA   |

|                           |                         |
|---------------------------|-------------------------|
| Rab35 sence:              | TACTGTTGCGTTTTGCAGACA   |
| Rab35 antisence:          | CCCCGATAATACGTGGAGGTG   |
| U6 sence:                 | CTCGCTTCGGCAGCACA       |
| U6 antisence:             | AACGCTTCACGAATTTGCGT    |
| $\beta$ -Actin sence:     | CATGTACGTTGCTATCCAGGC   |
| $\beta$ -Actin antisence: | CTCCTTAATGTCACGCACGAT   |
| GAPDH sence:              | GGAGCGAGATCCCTCCAAAAT   |
| GAPDH antisence:          | GGCTGTTGTCATACTTCTCATGG |
